# Supplementary material for: Revisiting the Interaction of Melittin with Phospholipid Bilayers: The Effects of Concentration and Ionic Strength
Source: PubMed Central journal article supplement (PMC7037773; doi:10.3390/ijms21030746), 2020-01-23
Supplement: ijms-21-00746-s001.pdf [file ijms-21-00746-s001.pdf]

# Revisiting the interaction of melittin with phospholipid bilayers: the effects of concentration and ionic strength

## Supplementary Information

Thiru Sabapathy <sup>1</sup>, Evelyne Deplazes <sup>1,2,†</sup> and Ricardo L. Mancera <sup>1,†,\*</sup>

<sup>1</sup> School of Pharmacy and Biomedical Sciences, Curtin Health Innovation Research Institute, Curtin University, GPO Box U1987, Perth WA 6845, Australia

<sup>2</sup> School of Life Sciences, University of Technology Sydney, Ultimo NSW 2007 Australia

\* Correspondence: R.Mancera@curtin.edu.au

† co- corresponding authors.

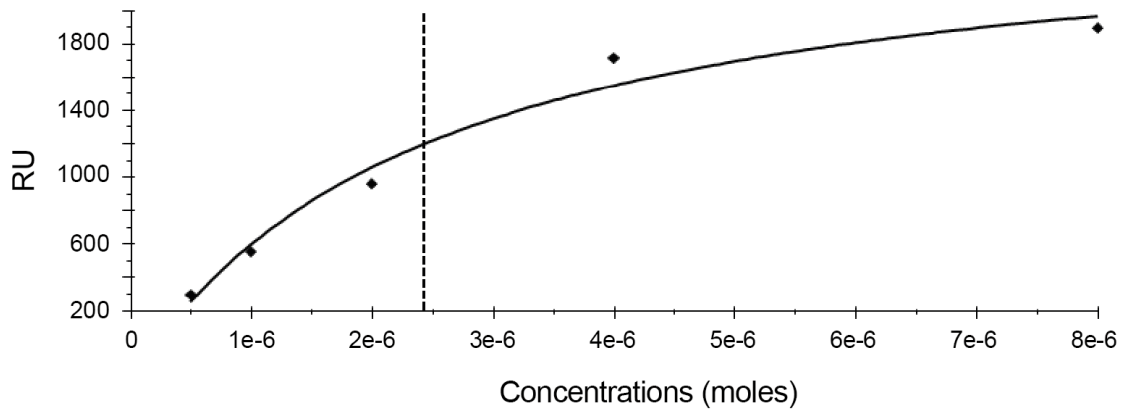

**Figure S1** – Steady affinity curve for melittin:POPC interaction derived from multi-cycle kinetics plot– ‘high’ concentration range.

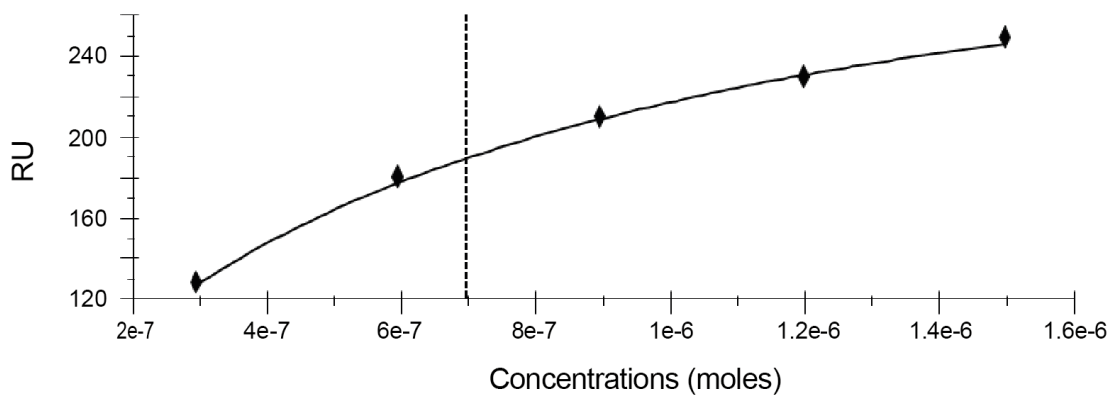

**Figure S2** – Steady affinity curve for melittin:POPC interaction derived from single-cycle kinetics plot – ‘mid’ concentration range

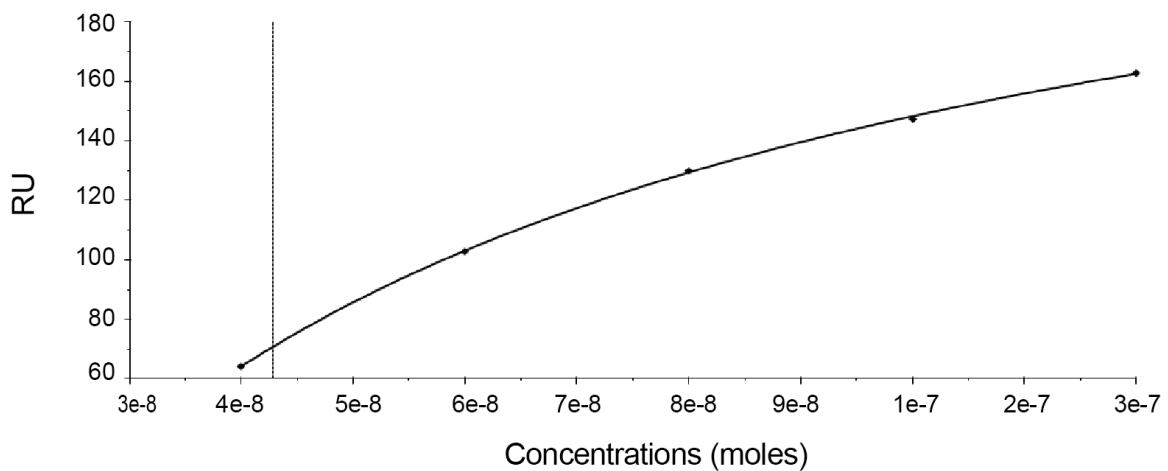

**Figure S3** – Steady affinity curve for melittin:POPC interaction derived from single-cycle kinetics plot– ‘low’ concentration range.
